# Supplementary material for: Evolution of Public Health Human Papillomavirus Immunization Programs in Canada
Source: MDPI journal article supplement (doi:10.3390/curroncol28010097), 2021-02-22
Supplement: s1 [file s1]

**Table S1.** PICO(+) framework

| <b>Item</b>   | <b>Description</b>                                                                                                                                                                                                       |
|---------------|--------------------------------------------------------------------------------------------------------------------------------------------------------------------------------------------------------------------------|
| Population    | All populations that have received an HPV vaccine or have been eligible to receive an HPV vaccine in Canada, by province/territory, including primary and catch-up cohorts and populations at high risk of HPV infection |
| Interventions | All vaccination programs in Canada                                                                                                                                                                                       |
| Comparisons   | Not applicable                                                                                                                                                                                                           |
| Outcomes      | HPV vaccine coverage rate by age, sex, year, and province/territory                                                                                                                                                      |
| Time          | No restrictions                                                                                                                                                                                                          |
| Study design  | Not applicable                                                                                                                                                                                                           |
